# Supplementary material
Source: PubMed Central journal article supplement (PMC7482577)
Supplement: rsif20200358supp1.pdf [file rsif20200358supp1.pdf]

# Supplemental material 1: Raw data

## Learning from plant movements triggered by bulliform cells: the biomimetic cellular actuator

Anja Mader<sup>1</sup>, Max Langer<sup>2</sup>, Jan Knippers<sup>1</sup>, Olga Speck<sup>2,3,\*</sup>

1 Institute of Building Structures and Structural Design (ITKE), University of Stuttgart, Stuttgart, Germany

2 Plant Biomechanics Group, Botanic Garden, Faculty of Biology, University of Freiburg, Freiburg, Germany

3 Cluster of Excellence *liv* MatS @ FIT – Freiburg Center for Interactive Materials and Bioinspired Technologies, University of Freiburg, Freiburg, Germany

\*olga.speck@biologie.uni-freiburg.de

*Sesleria nitida*

| Cell number | Chlorenchyma cell       |                        | Aspect ratio [∕]<br>length/width | Chlorenchyma cell      |
|-------------|-------------------------|------------------------|----------------------------------|------------------------|
|             | diameter [μm]<br>length | diameter [μm]<br>width |                                  | wall thickness<br>[μm] |
| 1           | 32.77                   | 16.71                  | 1.96                             | 3.68                   |
| 2           | 26.84                   | 17.54                  | 1.53                             | 2.83                   |
| 3           | 40.12                   | 14.91                  | 2.69                             | 2.32                   |
| 4           | 40.35                   | 18.47                  | 2.18                             | 2.85                   |
| 5           | 35.21                   | 15.36                  | 2.29                             | 2.32                   |
| 6           | 34.64                   | 18.97                  | 1.83                             | 1.44                   |
| 7           | 26.78                   | 16.38                  | 1.63                             | 2.57                   |
| 8           | 29.14                   | 15.78                  | 1.85                             | 2.96                   |
| 9           | 23.57                   | 17.25                  | 1.37                             | 3.91                   |
| 10          | 32.84                   | 13.94                  | 2.36                             | 3.45                   |
| 11          | 41.40                   | 14.11                  | 2.93                             | 3.28                   |
| 12          | 27.03                   | 23.29                  | 1.16                             | 1.82                   |
| 13          | 34.78                   | 17.24                  | 2.02                             | 2.71                   |
| 14          | 20.63                   | 25.04                  | 0.82                             | 2.83                   |
| 15          | 25.63                   | 19.36                  | 1.32                             | 2.19                   |
| 16          | 25.46                   | 21.05                  | 1.21                             | 2.44                   |
| 17          | 24.20                   | 17.26                  | 1.40                             | 3.60                   |
| 18          | 31.56                   | 23.68                  | 1.33                             | 4.47                   |
| 19          | 19.56                   | 26.78                  | 0.73                             | 3.36                   |
| 20          | 23.49                   | 22.92                  | 1.02                             | 1.74                   |
| 21          | 19.51                   | 19.27                  | 1.01                             | 1.78                   |
| 22          | 21.85                   | 25.03                  | 0.87                             | 1.45                   |
| 23          | 22.11                   | 15.96                  | 1.39                             | 2.41                   |
| 24          | 38.84                   | 19.94                  | 1.95                             | 2.03                   |
| 25          | 23.91                   | 22.64                  | 1.06                             | 1.22                   |
| 26          | 16.50                   | 30.03                  | 0.55                             | 1.68                   |
| 27          | 29.89                   | 20.87                  | 1.43                             | 2.37                   |
| 28          | 30.46                   | 21.16                  | 1.44                             | 2.20                   |
| 29          | 18.26                   | 20.85                  | 0.88                             | 1.83                   |
| 30          | 15.54                   | 20.83                  | 0.75                             | 2.16                   |
| 31          | 31.75                   | 16.33                  | 1.94                             | 1.99                   |
| 32          | 19.15                   | 12.93                  | 1.48                             | 2.76                   |
| 33          | 18.03                   | 19.52                  | 0.92                             | 3.23                   |
| 34          | 20.41                   | 21.57                  | 0.95                             | 1.51                   |
| 35          | 17.09                   | 20.73                  | 0.82                             | 2.78                   |
| 36          | 15.23                   | 30.63                  | 0.50                             | 1.87                   |
| 37          | 24.12                   | 15.34                  | 1.57                             | 2.12                   |
| 38          | 33.83                   | 15.08                  | 2.24                             | 2.32                   |
| 39          | 30.53                   | 21.21                  | 1.44                             | 2.82                   |
| 40          | 30.31                   | 15.27                  | 1.98                             | 2.85                   |
| 41          | 22.92                   | 16.34                  | 1.40                             | 1.93                   |
| 42          | 18.73                   | 26.52                  | 0.71                             | 1.87                   |
| 43          | 25.14                   | 16.41                  | 1.53                             | 2.24                   |
| 44          | 37.80                   | 20.83                  | 1.81                             | 1.87                   |

|                 |              |              |             |             |
|-----------------|--------------|--------------|-------------|-------------|
| 45              | 43.71        | 21.06        | 2.08        | 2.14        |
| 46              | 31.73        | 20.95        | 1.51        | 1.93        |
| 47              | 34.63        | 17.89        | 1.94        | 2.46        |
| 48              | 37.35        | 20.45        | 1.83        | 1.93        |
| 49              | 39.40        | 20.00        | 1.97        | 1.95        |
| 50              | 44.86        | 28.92        | 1.55        | 2.55        |
| <b>Mean</b>     | <b>28.19</b> | <b>19.81</b> | <b>1.50</b> | <b>2.42</b> |
| <b>SD</b>       | <b>8.03</b>  | <b>4.18</b>  | <b>0.56</b> | <b>0.69</b> |
| <b>Median</b>   | <b>26.93</b> | <b>19.73</b> | <b>1.46</b> | <b>2.32</b> |
| <b>IQR</b>      | <b>12.52</b> | <b>4.81</b>  | <b>0.91</b> | <b>0.90</b> |
| <b>Min</b>      | <b>15.23</b> | <b>12.93</b> | <b>0.50</b> | <b>1.22</b> |
| <b>Max</b>      | <b>44.86</b> | <b>30.63</b> | <b>2.93</b> | <b>4.47</b> |
| <b><i>n</i></b> | <b>50</b>    | <b>50</b>    | <b>50</b>   | <b>50</b>   |

*Sesleria nitida*

| Cell number   | Bulliform cells | Bulliform cells | Aspect ratio [°] |
|---------------|-----------------|-----------------|------------------|
|               | diameter [μm]   | diameter [μm]   |                  |
|               | length          | width           | length/width     |
| 1             | 23.20           | 9.13            | 2.54             |
| 2             | 44.31           | 7.02            | 6.32             |
| 3             | 62.56           | 8.35            | 7.49             |
| 4             | 76.51           | 11.22           | 6.82             |
| 5             | 78.43           | 8.75            | 8.96             |
| 6             | 74.15           | 14.11           | 5.26             |
| 7             | 65.79           | 13.82           | 4.76             |
| 8             | 52.25           | 10.54           | 4.96             |
| 9             | 35.43           | 5.08            | 6.97             |
| 10            | 19.71           | 9.02            | 2.18             |
| 11            | 27.43           | 8.13            | 3.37             |
| 12            | 42.63           | 5.92            | 7.20             |
| 13            | 54.55           | 12.44           | 4.39             |
| 14            | 59.63           | 11.32           | 5.27             |
| 15            | 59.67           | 14.41           | 4.14             |
| 16            | 48.38           | 13.11           | 3.69             |
| 17            | 35.34           | 10.19           | 3.47             |
| 18            | 25.82           | 12.48           | 2.07             |
| 19            | 49.04           | 7.47            | 6.56             |
| <b>Mean</b>   | <b>49.20</b>    | <b>10.13</b>    | <b>5.07</b>      |
| <b>SD</b>     | <b>18.18</b>    | <b>2.80</b>     | <b>1.95</b>      |
| <b>Median</b> | <b>49.04</b>    | <b>10.19</b>    | <b>4.96</b>      |
| <b>IQR</b>    | <b>25.73</b>    | <b>4.21</b>     | <b>3.11</b>      |
| <b>Min</b>    | <b>19.71</b>    | <b>5.08</b>     | <b>2.07</b>      |
| <b>Max</b>    | <b>78.43</b>    | <b>14.41</b>    | <b>8.96</b>      |
| <b>n</b>      | <b>19</b>       | <b>19</b>       | <b>19</b>        |

*Sesleria nitida*

| <b>Bulliform cells: cell wall thickness [<math>\mu\text{m}</math>]</b> |                             |             |
|------------------------------------------------------------------------|-----------------------------|-------------|
| #                                                                      | abaxial and<br>mediolateral | adaxial     |
| 1                                                                      | 1.29                        | 3.16        |
| 2                                                                      | 1.16                        | 3.64        |
| 3                                                                      | 1.16                        | 3.25        |
| 4                                                                      | 1.09                        | 3.21        |
| 5                                                                      | 0.90                        | 3.25        |
| 6                                                                      | 0.81                        | 3.55        |
| 7                                                                      | 1.08                        | 3.55        |
| 8                                                                      | 0.95                        | 3.91        |
| 9                                                                      | 1.13                        | 4.04        |
| 10                                                                     | 0.99                        | 4.02        |
| 11                                                                     | 0.75                        | 3.28        |
| 12                                                                     | 0.98                        | 2.47        |
| 13                                                                     | 1.00                        | 2.58        |
| 14                                                                     | 1.16                        | 2.97        |
| 15                                                                     | 1.01                        | 2.73        |
| 16                                                                     | 0.86                        | 2.55        |
| 17                                                                     | 0.87                        | 2.97        |
| 18                                                                     | 0.83                        | 3.00        |
| 19                                                                     | 0.66                        | 3.16        |
| 20                                                                     | 0.90                        | 2.93        |
| 21                                                                     | 0.97                        | 2.72        |
| 22                                                                     | 1.03                        | 2.79        |
| 23                                                                     | 0.84                        | 3.12        |
| 24                                                                     | 1.02                        | 3.74        |
| 25                                                                     | 0.98                        | 2.82        |
| <b>Mean</b>                                                            | <b>0.98</b>                 | <b>3.18</b> |
| <b>SD</b>                                                              | <b>0.15</b>                 | <b>0.45</b> |
| <b>Median</b>                                                          | <b>0.98</b>                 | <b>3.16</b> |
| <b>IQR</b>                                                             | <b>0.23</b>                 | <b>0.79</b> |
| <b>Min</b>                                                             | <b>0.66</b>                 | <b>2.47</b> |
| <b>Max</b>                                                             | <b>1.29</b>                 | <b>4.04</b> |
| <b><i>n</i></b>                                                        | <b>25</b>                   | <b>25</b>   |

*Sesleria nitida*

| Sample number | opening angle [°] | opening angle [°] | Difference [°] |
|---------------|-------------------|-------------------|----------------|
| status        | fresh             | dried             |                |
| 1             | 79.79             | 25.23             | 54.56          |
| 2             | 94.34             | 18.89             | 75.45          |
| 3             | 82.43             | 24.63             | 57.79          |
| 4             | 82.48             | 23.88             | 58.60          |
| 5             | 94.70             | 71.50             | 23.20          |
| 6             | 96.65             | 18.67             | 77.98          |
| 7             | 72.60             | 21.09             | 51.50          |
| 8             | 96.80             | 55.37             | 41.43          |
| 9             | 109.19            | 65.47             | 43.72          |
| 10            | 97.33             | 38.30             | 59.04          |
| <b>Mean</b>   | <b>90.63</b>      | <b>36.30</b>      | <b>54.33</b>   |
| <b>SD</b>     | <b>10.91</b>      | <b>20.32</b>      | <b>16.03</b>   |
| <b>Median</b> | <b>94.52</b>      | <b>24.93</b>      | <b>56.17</b>   |
| <b>IQR</b>    | <b>14.32</b>      | <b>29.31</b>      | <b>13.26</b>   |
| <b>Min</b>    | <b>72.60</b>      | <b>18.67</b>      | <b>23.20</b>   |
| <b>Max</b>    | <b>109.19</b>     | <b>71.50</b>      | <b>77.98</b>   |
| <b>n</b>      | <b>10</b>         | <b>10</b>         | <b>10</b>      |

*Sesleria nitida*

| Hoop stress  | $\sigma_H = (P \cdot d) / (2 \cdot t)$ |                  |
|--------------|----------------------------------------|------------------|
| t [m]        | 0.00000098                             |                  |
| dmaj [m]     | 4.92E-05                               | 2.9665E-05 dmean |
| dmin [m]     | 1.013E-05                              |                  |
| Pturg [Pa]   | 450000                                 |                  |
| Pdehyd [Pa]  | 380000                                 |                  |
| Hturg [MPa]  |                                        | 6.81             |
| Hdehyd [MPa] |                                        | 5.75             |

**Simulation opening angle (Figure 5)**

| <b>internal cell pressure [MPa]</b> | <b>change in opening angle [°]</b> |
|-------------------------------------|------------------------------------|
| 3.50E-03                            | 3.052                              |
| 3.97E-03                            | 3.472                              |
| 4.43E-03                            | 3.897                              |
| 5.13E-03                            | 4.543                              |
| 6.18E-03                            | 5.528                              |
| 7.23E-03                            | 6.519                              |
| 8.28E-03                            | 7.504                              |
| 9.33E-03                            | 8.478                              |
| 1.04E-02                            | 9.437                              |
| 1.14E-02                            | 10.378                             |
| 1.25E-02                            | 11.301                             |
| 1.35E-02                            | 12.204                             |
| 1.46E-02                            | 13.086                             |
| 1.56E-02                            | 13.950                             |
| 1.72E-02                            | 15.217                             |
| 1.88E-02                            | 16.453                             |
| 2.04E-02                            | 17.664                             |
| 2.19E-02                            | 18.855                             |
| 2.35E-02                            | 20.030                             |
| 2.59E-02                            | 21.766                             |
| 2.82E-02                            | 23.474                             |
| 3.17E-02                            | 25.968                             |
| 3.52E-02                            | 28.433                             |
| 3.87E-02                            | 30.877                             |
| 4.22E-02                            | 33.307                             |
| 4.57E-02                            | 35.742                             |
| 4.92E-02                            | 38.179                             |
| 5.27E-02                            | 40.628                             |
| 5.62E-02                            | 43.101                             |
| 5.97E-02                            | 45.607                             |
| 6.32E-02                            | 48.131                             |
| 6.67E-02                            | 50.665                             |
| 6.79E-02                            | 51.497                             |
| 6.90E-02                            | 52.321                             |
| 7.00E-02                            | 53.030                             |



**Simulation opening angle (Figure 8)**

| <b>internal cell pressure [MPa]</b> | <b>vertical sidewall angle [°]</b> |
|-------------------------------------|------------------------------------|
| 0.00125                             | 0.370715095                        |
| 0.00250                             | 0.729857785                        |
| 0.00375                             | 1.078044032                        |
| 0.00500                             | 1.415869922                        |
| 0.00625                             | 1.744000231                        |
| 0.00750                             | 2.062767498                        |
| 0.00875                             | 2.372767505                        |
| 0.01000                             | 2.674347978                        |
| 0.01125                             | 2.967970404                        |
| 0.01250                             | 3.253989635                        |
| 0.01375                             | 3.532759876                        |
| 0.01500                             | 3.80463483                         |
| 0.01625                             | 4.069835255                        |
| 0.01750                             | 4.328669857                        |
| 0.01875                             | 4.581447093                        |
| 0.02000                             | 4.82816564                         |
| 0.02125                             | 5.069620076                        |
| 0.02250                             | 5.305322033                        |
| 0.02375                             | 5.536110379                        |
| 0.02500                             | 5.761495954                        |
