# Supplementary material
Source: PubMed Central journal article supplement (PMC7482577)
Supplement: rsif20200358supp2.pdf [file rsif20200358supp2.pdf]

## Supplemental material 2: Morphometric data of the biological model

### Learning from plant movements triggered by bulliform cells: the biomimetic cellular actuator

Anja Mader<sup>1</sup>, Max Langer<sup>2</sup>, Jan Knippers<sup>1</sup>, Olga Speck<sup>2,3,\*</sup>

1 Institute of Building Structures and Structural Design (ITKE), University of Stuttgart, Stuttgart, Germany

2 Plant Biomechanics Group, Botanic Garden, Faculty of Biology, University of Freiburg, Freiburg, Germany

3 Cluster of Excellence *livMatS @ FIT* – Freiburg Center for Interactive Materials and Bioinspired Technologies, University of Freiburg, Freiburg, Germany

\*olga.speck@biologie.uni-freiburg.de

**Table S1.** Morphometric data measured in leaves of *Sesleria nitida*. Median values (med) with interquartile ranges (IQR), means (mean)  $\pm$  one standard deviation (sd), minima (min) and maxima (max), and the sample sizes ( $n$ ) for each parameter are given.

|                                                                | med   | IQR   | mean  | sd    | min   | max    | $n$ |
|----------------------------------------------------------------|-------|-------|-------|-------|-------|--------|-----|
| <b>Chlorenchyma cells</b>                                      |       |       |       |       |       |        |     |
| Major diameter ( $\mu\text{m}$ )                               | 26.93 | 12.52 | 28.19 | 8.03  | 15.23 | 44.86  | 50  |
| Minor diameter ( $\mu\text{m}$ )                               | 19.73 | 4.81  | 19.81 | 4.18  | 12.93 | 30.63  | 50  |
| Aspect ratio (/)                                               | 1.46  | 0.91  | 1.50  | 0.56  | 0.50  | 2.93   | 50  |
| Cell wall thickness ( $\mu\text{m}$ )                          | 2.32  | 0.90  | 2.42  | 0.69  | 1.22  | 4.47   | 50  |
| <b>Bulliform cells</b>                                         |       |       |       |       |       |        |     |
| Major diameter ( $\mu\text{m}$ )                               | 49.04 | 25.73 | 49.20 | 18.18 | 19.71 | 78.43  | 19  |
| Minor diameter ( $\mu\text{m}$ )                               | 4.21  | 4.21  | 10.13 | 2.80  | 5.08  | 14.41  | 19  |
| Aspect ratio (/)                                               | 4.96  | 3.11  | 5.07  | 1.95  | 2.07  | 8.96   | 19  |
| Abaxial and mediolateral cell wall thickness ( $\mu\text{m}$ ) | 0.98  | 0.23  | 0.98  | 0.15  | 0.66  | 1.29   | 25  |
| Adaxial cell wall thickness ( $\mu\text{m}$ )                  | 3.16  | 0.79  | 3.18  | 0.45  | 2.47  | 4.04   | 25  |
| <b>Opening angle</b>                                           |       |       |       |       |       |        |     |
| Fresh leaves ( $^\circ$ )                                      | 94.52 | 14.32 | 90.63 | 10.91 | 72.60 | 109.19 | 10  |
| Dried leaves ( $^\circ$ )                                      | 24.93 | 29.31 | 36.30 | 20.32 | 18.67 | 71.50  | 10  |
